# Supplementary material for: Rationally designed Ni2P/Ni/C as a positive electrode for high-performance hybrid supercapacitors
Source: Royal Society of Chemistry journal article supplement (doi:10.1039/d0nj00531b), 2020-01-01
Supplement: d0nj00531b1.pdf [file d0nj00531b1.pdf]

## Supporting Information

### **Rational designed Ni<sub>2</sub>P/Ni/C as positive electrode materials for high-performance hybrid supercapacitors**

Yanchao Xu<sup>#1</sup>, Shanshan Xiong<sup>#1,2</sup>, Shuting Weng<sup>1</sup>, Juan Wang<sup>3</sup>, Jing Wang<sup>4</sup>, Hongjun Lin<sup>1</sup>, Yang Jiao<sup>\*1</sup>, Jianrong Chen<sup>\*1,2</sup>

**\*Corresponding author:** E-mail: yangjiao@zjnu.edu.cn and cjr@zjnu.cn, **Phone:** (+86)-0579-82291275

1 College of Geography and environmental Sciences, Zhejiang Normal University, Jinhua, 321004, China

2 College of Chemistry and Life Sciences, Zhejiang Normal University, Jinhua, 321004, China

3 Jinhua Huanke Environment Technology Co. LTD, Jinhua, 321004, China

4 School of light industry, Harbin university of commerce, Harbin, 150028, China

<sup>#</sup> These two authors contributed equally

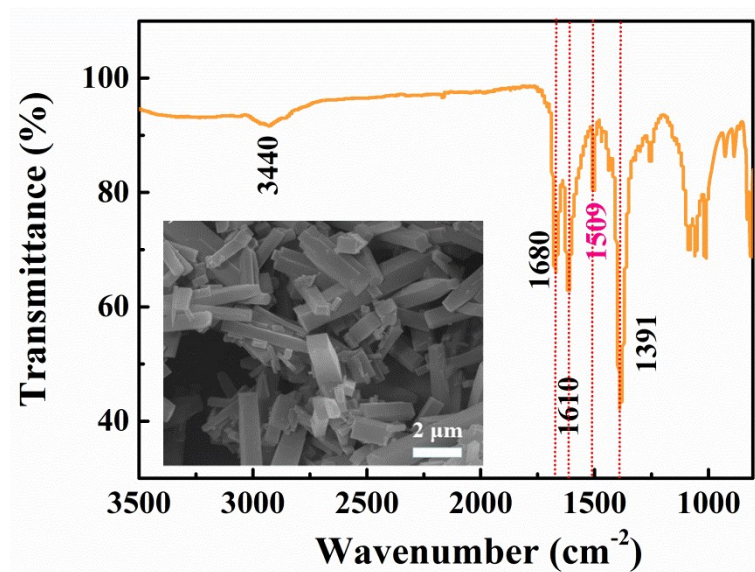

Fig. S1 The FT-IR spectrum of Ni-MOF (inset shows the SEM image of Ni-MOF).

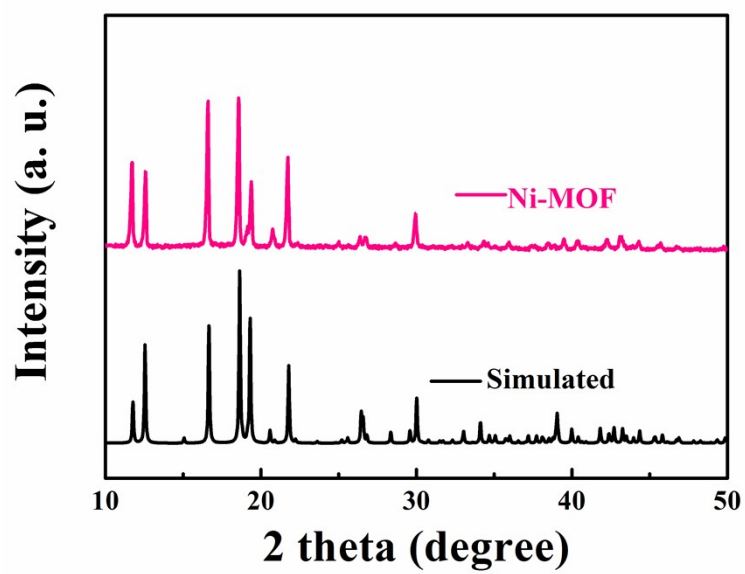

**Fig. S2** The XRD patterns of as-prepared Ni-MOF and simulated from the crystal structure data of  $\{\text{Ni}_2(\text{bdc})_2(\text{ted})\}$

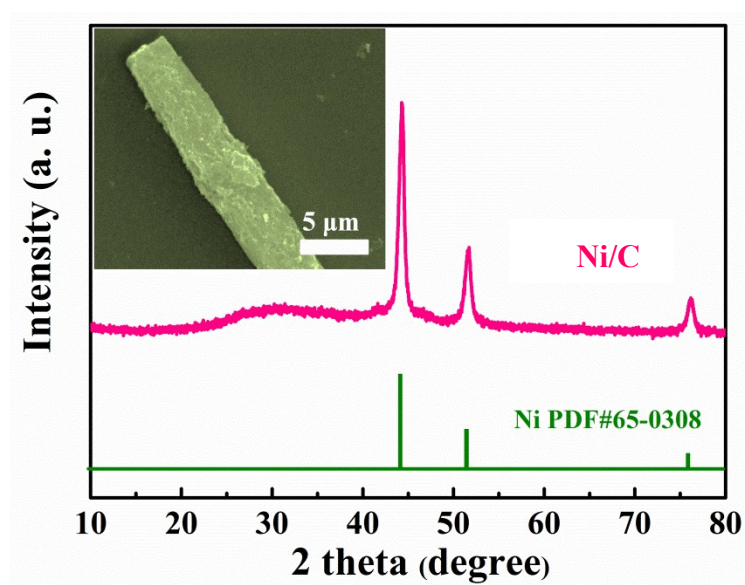

**Fig. S3** The XRD pattern of sample is synthesized by annealing Ni-MOF under nitrogen atmosphere (inset shows the SEM image of Ni/C)

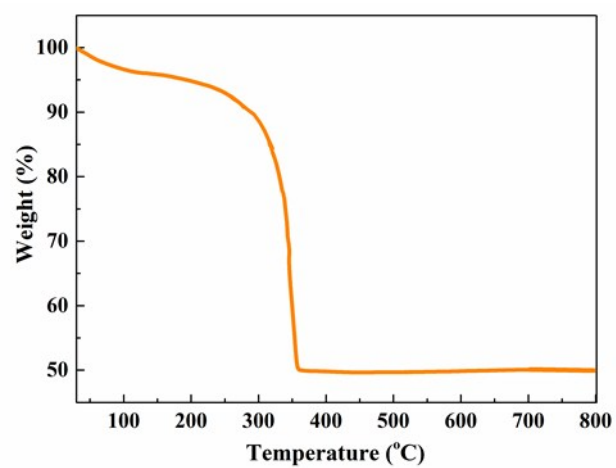

Fig. S4 The TGA curve of Ni<sub>2</sub>P/Ni/C.

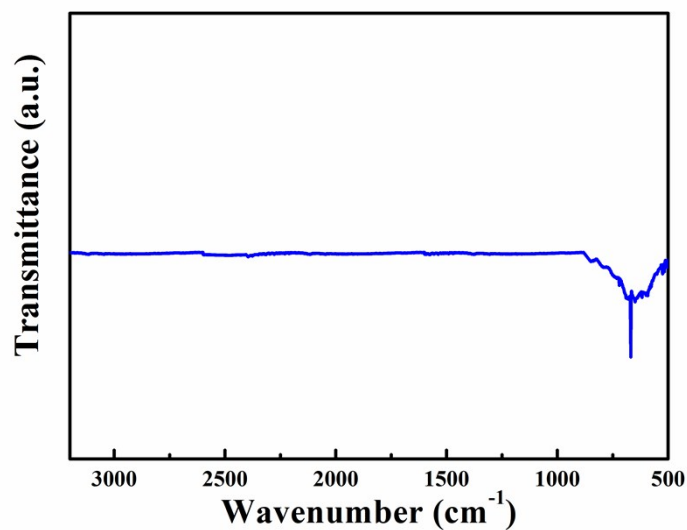

Fig. S5 The FT-IR spectrum of Ni<sub>2</sub>P/Ni/C.

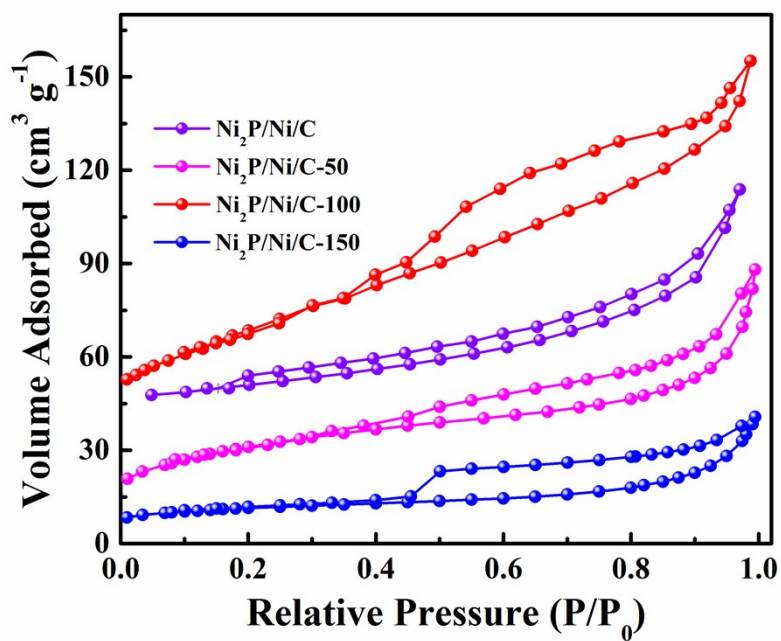

Fig. S6 The Nitrogen adsorption and desorption test of four materials.

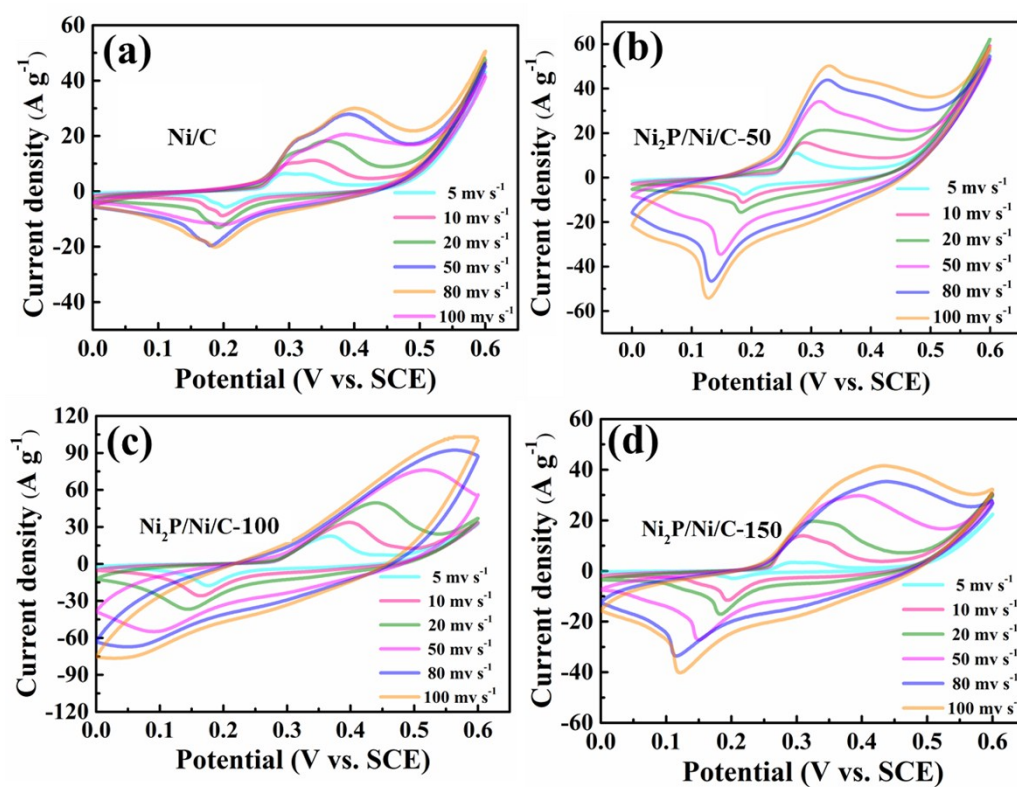

**Fig. S7** The CV curves of four samples at various scan rates: (a) Ni/C, (b) Ni<sub>2</sub>P/Ni/C-50, (b) Ni<sub>2</sub>P/Ni/C-100, (b) Ni<sub>2</sub>P/Ni/C-150.

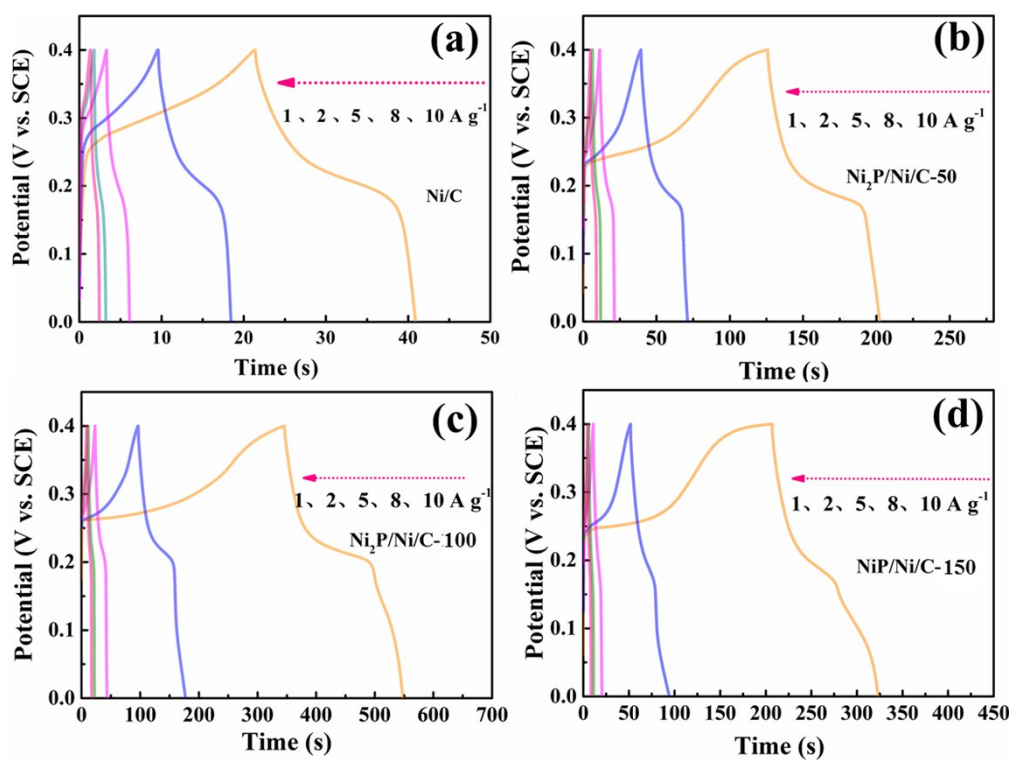

**Fig. S8** The GCD curves of four samples at different current densities: (a) Ni/C, (b) Ni<sub>2</sub>P/Ni/C-50, (c) Ni<sub>2</sub>P/Ni/C-100, (d) Ni<sub>2</sub>P/Ni/C-150.

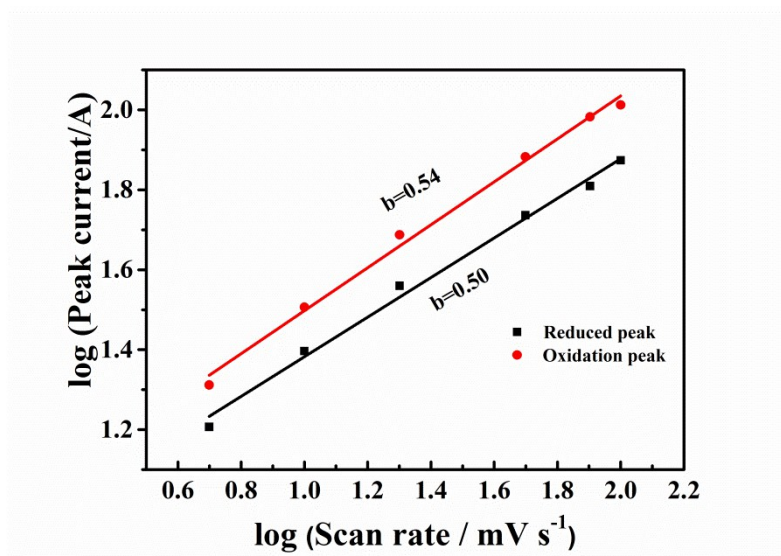

**Fig. S9** b values of Ni<sub>2</sub>P/Ni/C-100 electrode materials to analyze the diffusion/capacity behaviors

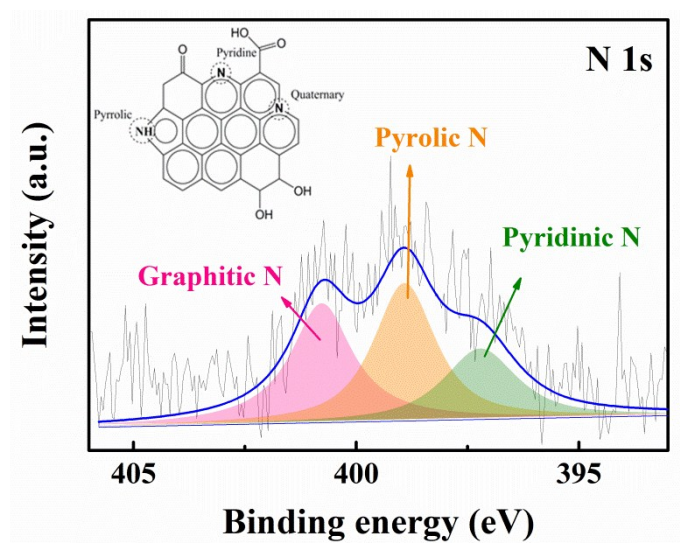

**Fig. S10** The N 1s XPS spectra of Ni<sub>2</sub>P/Ni/C-100.

### **Preparation of negative electrode and its electrochemical performances:**

ZIF-8 materials were prepared by a simple reaction of 2-methylimidazole with Zn(NO<sub>3</sub>)<sub>2</sub>. The carbonization of ZIF-8 at 950 °C gives porous carbon.

The negative electrode for the asymmetric supercapacitor (ASC) was prepared by mixing ZIF-8 derived porous carbon (PC), carbon black, polyvinylene difluoride (PVDF) (in the weight ratio of 8: 1: 1) together using NMP as solvent. The mixture was coated onto the cleaned Ni foam (1×1 cm<sup>2</sup>) and was kept for drying at 80 °C overnight. Then the electrode was used as the working electrode. 3 M KOH solution, saturated calomel electrode (SCE) and platinum foil were used as the electrolytes, reference and counter electrodes, respectively. The PC electrode shows excellent electric double-layer capacitance property with a nearly rectangular shape (Fig. S6a). The specific capacitance of PC can be calculated from Fig. S6b and the value reach up

to  $112 \text{ F g}^{-1}$  at  $1 \text{ A g}^{-1}$  (Fig. S6c). Meanwhile, the PC has the small charge transfer resistance and equivalent series resistance, which is beneficial to the effective transmission of electrons. (Fig. S6d).

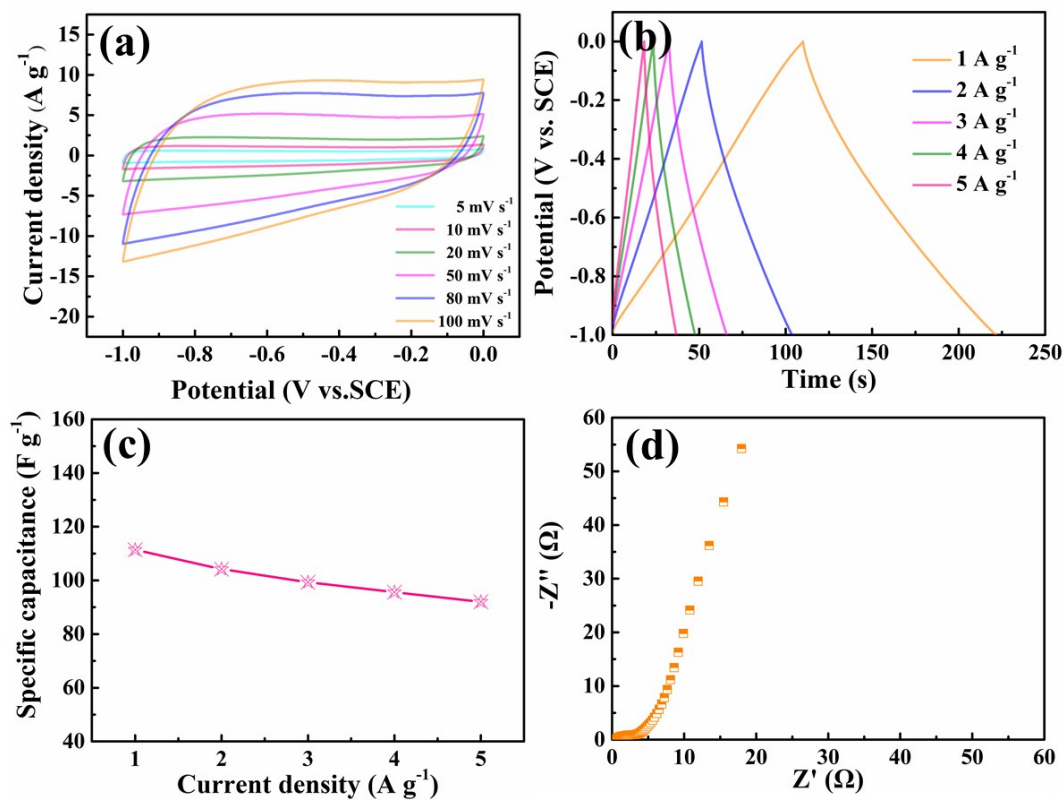

**Fig. S11** The electrochemical performance of porous carbon: (a) CV curves at various scan rates, (b) GCD curves at various current densities, (c) Specific capacitance of porous carbon as a function of discharge current density, (d) Nyquist plots.
